# Supplementary material for: Causal associations between chronic hepatitis B and COVID-19 in East Asian populations
Source: Virol J. 2023 Jun 1;20:109. doi: 10.1186/s12985-023-02081-4 (PMC10232343; doi:10.1186/s12985-023-02081-4)
Supplement: Supplementary file 1 — Additional file 1. Table 1. Instrumental variables strongly associated with CHB. Table 2. Detailed data after harmonization of instrumental variables for CHB with the SARS-CoV-2 infection dataset. Table 3. Detailed data after harmonization of instrumental variables for CHB with the hospitalized COVID-19 dataset. Table 4. Detailed data after harmonization of instrumental variables for CHB with the severe COVID-19 dataset. Table 5. Sensitivity analysis of the causal association of COVID-19 with CHB. [file 12985_2023_2081_MOESM1_ESM.xlsx]

## Sheet: Table S1
Table S1. Instrumental variables strongly associated with CHB.
SNP	se.exposure	beta.exposure	chr.exposure	pval.exposure	pos.exposure	effect_allele.exposure	other_allele.exposure	eaf.exposure	exposure	F
rs3130785	0.0633873	0.508149	6	1.09e-15	30796738	C	T	0.880819	|| id:bbj-a-99	64.2655
rs2523545	0.0601607	0.550566	6	5.61e-20	31333499	A	G	0.871667	|| id:bbj-a-99	83.7516
rs2516518	0.0783357	-0.483845	6	6.55e-10	31435119	A	G	0.0766185	|| id:bbj-a-99	38.1499
rs2071287	0.0403423	-0.357342	6	8.16e-19	32170433	T	C	0.346743	|| id:bbj-a-99	78.4597
rs11757876	0.085887	-0.737898	6	8.58e-18	32232165	T	C	0.0621208	|| id:bbj-a-99	73.8138
rs16870693	0.0524686	0.3457	6	4.44e-11	32711691	A	C	0.170368	|| id:bbj-a-99	43.411
rs1264569	0.0934109	0.553201	6	3.18e-09	30365320	T	C	0.948222	|| id:bbj-a-99	35.0728
rs3131007	0.041622	0.34087	6	2.62e-16	31098344	T	A	0.68933	|| id:bbj-a-99	67.0705
rs909267	0.0754155	-0.597084	6	2.43e-15	31746548	C	T	0.0785742	|| id:bbj-a-99	62.683
rs113720465	0.088593	-0.576779	6	7.49e-11	32005355	A	G	0.0577905	|| id:bbj-a-99	42.3858
rs9378180	0.0380315	0.208351	6	4.29e-08	33099401	T	A	0.508596	|| id:bbj-a-99	30.0126
rs56386174	0.104076	0.613308	6	3.79e-09	33591103	T	G	0.958759	|| id:bbj-a-99	34.7261
rs73408232	0.10166	-0.558572	6	3.92e-08	33626042	T	C	0.0404927	|| id:bbj-a-99	30.1897
rs3998115	0.0737906	0.612762	6	1.01e-16	33784833	C	G	0.917505	|| id:bbj-a-99	68.9575
rs7741871	0.0638857	-0.433991	6	1.1e-11	33864354	A	G	0.108106	|| id:bbj-a-99	46.1481
rs4148871	0.0544363	0.425938	6	5.1e-15	32803316	G	A	0.841846	|| id:bbj-a-99	61.2231
rs6913309	0.0616765	-0.666869	6	3.01e-27	32339840	A	T	0.127948	|| id:bbj-a-99	116.907
rs549060653	0.0977664	-0.57004	6	5.52e-09	30480350	T	C	0.0463799	|| id:bbj-a-99	33.9963
rs77746323	0.0397601	0.516645	6	1.32e-38	33036401	T	C	0.598984	|| id:bbj-a-99	168.846
rs114634557	0.0988412	-0.601234	6	1.18e-09	30681315	T	G	0.0471165	|| id:bbj-a-99	37.0008
rs769174	0.0788913	-0.517212	6	5.53e-11	31551066	G	C	0.0696424	|| id:bbj-a-99	42.9812
rs187940579	0.0919943	-0.831584	6	1.57e-19	32448094	A	C	0.0680787	|| id:bbj-a-99	81.7129
rs4713602	0.0691837	-0.609692	6	1.22e-18	32965889	A	C	0.117758	|| id:bbj-a-99	77.6629
rs12664430	0.0809408	-0.522091	6	1.12e-10	33272677	T	C	0.0659395	|| id:bbj-a-99	41.6061
rs75509151	0.0890634	-0.587465	6	4.22e-11	31656514	T	C	0.0544243	|| id:bbj-a-99	43.5076
rs4148878	0.0871663	-0.729237	6	5.96e-17	32822186	G	T	0.0613337	|| id:bbj-a-99	69.9907
rs114485144	0.10073	-0.596902	6	3.11e-09	33376436	C	T	0.0420556	|| id:bbj-a-99	35.1147
rs181816009	0.078827	-0.496369	6	3.04e-10	31423412	A	G	0.0741036	|| id:bbj-a-99	39.6515
rs11758242	0.0801738	-0.562584	6	2.27e-12	31639845	A	C	0.0680462	|| id:bbj-a-99	49.2391
rs28869508	0.0576931	-0.464699	6	7.97e-16	32343735	T	C	0.140952	|| id:bbj-a-99	64.8777
rs6917611	0.0381188	0.222751	6	5.11e-09	32774954	C	G	0.481247	|| id:bbj-a-99	34.1477
rs2523655	0.0617001	0.562514	6	7.73e-20	31444604	G	A	0.87244	|| id:bbj-a-99	83.118
rs499606	0.0512678	0.352013	6	6.59e-12	32194308	T	C	0.178778	|| id:bbj-a-99	47.1442
rs86715	0.0703847	-0.663203	6	4.4e-21	33480435	G	A	0.0929663	|| id:bbj-a-99	88.7844
rs9348734	0.047403	0.266271	6	1.94e-08	26872409	T	C	0.765163	|| id:bbj-a-99	31.5527
rs12614	0.078631	-0.649072	6	1.52e-16	31914179	T	C	0.0729131	|| id:bbj-a-99	68.1394
rs9264086	0.0381991	0.265911	6	3.37e-12	31201684	A	G	0.532574	|| id:bbj-a-99	48.4581
rs2763977	0.0884428	-0.564897	6	1.69e-10	31786963	A	G	0.0567954	|| id:bbj-a-99	40.7956
rs2517459	0.0556422	0.465482	6	5.98e-17	30897022	C	T	0.847723	|| id:bbj-a-99	69.9837
rs4713643	0.0745181	0.676957	6	1.04e-19	33594437	A	C	0.916226	|| id:bbj-a-99	82.5275
rs4538748	0.0408114	0.518223	6	6.07e-37	32657505	C	T	0.648051	|| id:bbj-a-99	161.239
rs9262562	0.074244	-0.413952	6	2.47e-08	31008949	A	G	0.0755227	|| id:bbj-a-99	31.0869
rs58110932	0.0389842	0.292833	6	5.84e-14	32371292	T	A	0.394229	|| id:bbj-a-99	56.4239
rs28359884	0.0394983	-0.340367	6	6.86e-18	32584330	A	C	0.500766	|| id:bbj-a-99	74.2571
rs111718686	0.0880741	-0.584032	6	3.33e-11	32697405	C	T	0.0584124	|| id:bbj-a-99	43.9721
rs114815710	0.0772799	-0.428239	6	3e-08	30942121	A	G	0.0699852	|| id:bbj-a-99	30.7071
rs28360975	0.0724373	-0.410106	6	1.5e-08	30978834	T	G	0.0792924	|| id:bbj-a-99	32.0529
rs9468975	0.0423381	0.285596	6	1.52e-11	31320467	T	C	0.335984	|| id:bbj-a-99	45.5032
rs116037546	0.102798	-0.582111	6	1.49e-08	30238581	G	A	0.042731	|| id:bbj-a-99	32.0658
rs34249798	0.0832928	-0.677813	6	4.03e-16	31870183	T	G	0.065259	|| id:bbj-a-99	66.2224
rs374698	0.0866801	-0.692653	6	1.34e-15	32012279	T	C	0.068768	|| id:bbj-a-99	63.8547
rs2071025	0.040854	0.351832	6	7.18e-18	33143756	G	A	0.669424	|| id:bbj-a-99	74.1654
rs112199989	0.100173	-0.707237	6	1.66e-12	33308380	A	G	0.0500135	|| id:bbj-a-99	49.8458
rs1003879	0.0391892	0.294129	6	6.12e-14	32299592	A	G	0.382035	|| id:bbj-a-99	56.3304
rs9296067	0.0462203	-0.365883	6	2.45e-15	32988340	T	C	0.236557	|| id:bbj-a-99	62.6641

## Sheet: Table S2
Table S2. Detailed data after harmonization of instrumental variables for CHB with the SARS-CoV-2 infection dataset.
SNP	effect_allele.exposure	other_allele.exposure	effect_allele.outcome	other_allele.outcome	beta.exposure	beta.outcome	eaf.exposure	eaf.outcome	remove	palindromic	ambiguous	id.outcome	chr.outcome	pos.outcome	se.outcome	pval.outcome	outcome	mr_keep.outcome	pval_origin.outcome	se.exposure	chr.exposure	pval.exposure	pos.exposure	id.exposure	exposure	mr_keep.exposure	pval_origin.exposure	data_source.exposure	action	mr_keep	r2
rs1003879	A	G	A	G	0.294129	0.063783	0.382035	0.4121	FALSE	FALSE	FALSE	OgLJ7a	6	32299592	0.042262	0.13125	outcome	TRUE	reported	0.0391892	6	6.12491e-14	32299592	bbj-a-99	|| id:bbj-a-99	TRUE	reported	igd	2	TRUE	0.000125192
rs111718686	C	T	C	T	-0.584032	0.027597	0.0584124	0.0715	FALSE	FALSE	FALSE	OgLJ7a	6	32697405	0.079299	0.72783	outcome	TRUE	reported	0.0880741	6	3.33119e-11	32697405	bbj-a-99	|| id:bbj-a-99	TRUE	reported	igd	2	TRUE	2.27672e-05
rs112199989	A	G	A	G	-0.707237	-0.047164	0.0500135	0.05231	FALSE	FALSE	FALSE	OgLJ7a	6	33308380	0.080712	0.55898	outcome	TRUE	reported	0.100173	6	1.66341e-12	33308380	bbj-a-99	|| id:bbj-a-99	TRUE	reported	igd	2	TRUE	2.22946e-05
rs113720465	A	G	A	G	-0.576779	-0.028349	0.0577905	0.05861	FALSE	FALSE	FALSE	OgLJ7a	6	32005355	0.098835	0.77424	outcome	TRUE	reported	0.088593	6	7.49376e-11	32005355	bbj-a-99	|| id:bbj-a-99	TRUE	reported	igd	2	TRUE	2.17266e-05
rs114485144	C	T	C	T	-0.596902	-0.071338	0.0420556	0.03065	FALSE	FALSE	FALSE	OgLJ7a	6	33376436	0.097048	0.46229	outcome	TRUE	reported	0.10073	6	3.10892e-09	33376436	bbj-a-99	|| id:bbj-a-99	TRUE	reported	igd	2	TRUE	1.33174e-05
rs114634557	T	G	T	G	-0.601234	-0.11758	0.0471165	0.03142	FALSE	FALSE	FALSE	OgLJ7a	6	30681315	0.10805	0.27649	outcome	TRUE	reported	0.0988412	6	1.18084e-09	30681315	bbj-a-99	|| id:bbj-a-99	TRUE	reported	igd	2	TRUE	1.56384e-05
rs114815710	A	G	A	G	-0.428239	-0.087829	0.0699852	0.06056	FALSE	FALSE	FALSE	OgLJ7a	6	30942121	0.09428	0.35156	outcome	TRUE	reported	0.0772799	6	3.00075e-08	30942121	bbj-a-99	|| id:bbj-a-99	TRUE	reported	igd	2	TRUE	1.88149e-05
rs116037546	G	A	G	A	-0.582111	-0.10012	0.042731	0.02588	FALSE	FALSE	FALSE	OgLJ7a	6	30238581	0.12662	0.42909	outcome	TRUE	reported	0.102798	6	1.49053e-08	30238581	bbj-a-99	|| id:bbj-a-99	TRUE	reported	igd	2	TRUE	1.23477e-05
rs11757876	T	C	T	C	-0.737898	-0.052191	0.0621208	0.05077	FALSE	FALSE	FALSE	OgLJ7a	6	32232165	0.10213	0.60933	outcome	TRUE	reported	0.085887	6	8.5842e-18	32232165	bbj-a-99	|| id:bbj-a-99	TRUE	reported	igd	2	TRUE	4.04845e-05
rs11758242	A	C	A	C	-0.562584	-0.0017553	0.0680462	0.05552	FALSE	FALSE	FALSE	OgLJ7a	6	31639845	0.093661	0.98505	outcome	TRUE	reported	0.0801738	6	2.26621e-12	31639845	bbj-a-99	|| id:bbj-a-99	TRUE	reported	igd	2	TRUE	2.93951e-05
rs12614	T	C	T	C	-0.649072	-0.040857	0.0729131	0.1045	FALSE	FALSE	FALSE	OgLJ7a	6	31914179	0.066469	0.53877	outcome	TRUE	reported	0.078631	6	1.52335e-16	31914179	bbj-a-99	|| id:bbj-a-99	TRUE	reported	igd	2	TRUE	4.33602e-05
rs1264569	T	C	T	C	0.553201	0.06456	0.948222	0.9511	FALSE	FALSE	FALSE	OgLJ7a	6	30365320	0.090005	0.47319	outcome	TRUE	reported	0.0934109	6	3.17614e-09	30365320	bbj-a-99	|| id:bbj-a-99	TRUE	reported	igd	2	TRUE	1.62104e-05
rs12664430	T	C	T	C	-0.522091	-0.01222	0.0659395	0.05164	FALSE	FALSE	FALSE	OgLJ7a	6	33272677	0.0764	0.87293	outcome	TRUE	reported	0.0809408	6	1.1164e-10	33272677	bbj-a-99	|| id:bbj-a-99	TRUE	reported	igd	2	TRUE	2.41238e-05
rs16870693	A	C	A	C	0.3457	-0.065702	0.170368	0.1137	FALSE	FALSE	FALSE	OgLJ7a	6	32711691	0.058036	0.2576	outcome	TRUE	reported	0.0524686	6	4.43711e-11	32711691	bbj-a-99	|| id:bbj-a-99	TRUE	reported	igd	2	TRUE	5.77618e-05
rs181816009	A	G	A	G	-0.496369	-0.037638	0.0741036	0.05572	FALSE	FALSE	FALSE	OgLJ7a	6	31423412	0.11521	0.7439	outcome	TRUE	reported	0.078827	6	3.03571e-10	31423412	bbj-a-99	|| id:bbj-a-99	TRUE	reported	igd	2	TRUE	2.56111e-05
rs187940579	A	C	A	C	-0.831584	-0.012681	0.0680787	0.07994	FALSE	FALSE	FALSE	OgLJ7a	6	32448094	0.082524	0.87787	outcome	TRUE	reported	0.0919943	6	1.57362e-19	32448094	bbj-a-99	|| id:bbj-a-99	TRUE	reported	igd	2	TRUE	4.88032e-05
rs2071025	G	A	G	A	0.351832	0.022192	0.669424	0.6164	FALSE	FALSE	FALSE	OgLJ7a	6	33143756	0.033656	0.50964	outcome	TRUE	reported	0.040854	6	7.18456e-18	33143756	bbj-a-99	|| id:bbj-a-99	TRUE	reported	igd	2	TRUE	0.000154505
rs2071287	T	C	T	C	-0.357342	-0.053759	0.346743	0.356	FALSE	FALSE	FALSE	OgLJ7a	6	32170433	0.033973	0.11355	outcome	TRUE	reported	0.0403423	6	8.16394e-19	32170433	bbj-a-99	|| id:bbj-a-99	TRUE	reported	igd	2	TRUE	0.000167304
rs2516518	A	G	A	G	-0.483845	-0.0092467	0.0766185	0.05433	FALSE	FALSE	FALSE	OgLJ7a	6	31435119	0.096294	0.9235	outcome	TRUE	reported	0.0783357	6	6.55149e-10	31435119	bbj-a-99	|| id:bbj-a-99	TRUE	reported	igd	2	TRUE	2.54083e-05
rs2517459	C	T	C	T	0.465482	0.066872	0.847723	0.8687	FALSE	FALSE	FALSE	OgLJ7a	6	30897022	0.05339	0.21038	outcome	TRUE	reported	0.0556422	6	5.97998e-17	30897022	bbj-a-99	|| id:bbj-a-99	TRUE	reported	igd	2	TRUE	8.50457e-05
rs2523545	A	G	A	G	0.550566	-0.038687	0.871667	0.841	FALSE	FALSE	FALSE	OgLJ7a	6	31333499	0.055769	0.48786	outcome	TRUE	reported	0.0601607	6	5.61048e-20	31333499	bbj-a-99	|| id:bbj-a-99	TRUE	reported	igd	2	TRUE	8.8196e-05
rs2523655	G	A	G	A	0.562514	0.047111	0.87244	0.9111	FALSE	FALSE	FALSE	OgLJ7a	6	31444604	0.075565	0.53299	outcome	TRUE	reported	0.0617001	6	7.73036e-20	31444604	bbj-a-99	|| id:bbj-a-99	TRUE	reported	igd	2	TRUE	8.70787e-05
rs2763977	A	G	A	G	-0.564897	-0.071193	0.0567954	0.0573	FALSE	FALSE	FALSE	OgLJ7a	6	31786963	0.093836	0.44803	outcome	TRUE	reported	0.0884428	6	1.69013e-10	31786963	bbj-a-99	|| id:bbj-a-99	TRUE	reported	igd	2	TRUE	2.05731e-05
rs28359884	A	C	A	C	-0.340367	-0.050506	0.500766	0.5422	FALSE	FALSE	FALSE	OgLJ7a	6	32584330	0.039419	0.2001	outcome	TRUE	reported	0.0394983	6	6.85804e-18	32584330	bbj-a-99	|| id:bbj-a-99	TRUE	reported	igd	2	TRUE	0.000174761
rs28360975	T	G	T	G	-0.410106	0.017912	0.0792924	0.1468	FALSE	FALSE	FALSE	OgLJ7a	6	30978834	0.060795	0.76828	outcome	TRUE	reported	0.0724373	6	1.50024e-08	30978834	bbj-a-99	|| id:bbj-a-99	TRUE	reported	igd	2	TRUE	2.20287e-05
rs28869508	T	C	T	C	-0.464699	0.068486	0.140952	0.1303	FALSE	FALSE	FALSE	OgLJ7a	6	32343735	0.049732	0.16848	outcome	TRUE	reported	0.0576931	6	7.96893e-16	32343735	bbj-a-99	|| id:bbj-a-99	TRUE	reported	igd	2	TRUE	7.39523e-05
rs3130785	C	T	C	T	0.508149	0.089703	0.880819	0.9041	FALSE	FALSE	FALSE	OgLJ7a	6	30796738	0.070604	0.2039	outcome	TRUE	reported	0.0633873	6	1.08743e-15	30796738	bbj-a-99	|| id:bbj-a-99	TRUE	reported	igd	2	TRUE	6.35095e-05
rs3131007	T	A	T	A	0.34087	-0.086414	0.68933	0.6035	FALSE	TRUE	FALSE	OgLJ7a	6	31098344	0.036269	0.01719	outcome	TRUE	reported	0.041622	6	2.61999e-16	31098344	bbj-a-99	|| id:bbj-a-99	TRUE	reported	igd	2	TRUE	0.000135215
rs34249798	T	G	T	G	-0.677813	0.02889	0.065259	0.06927	FALSE	FALSE	FALSE	OgLJ7a	6	31870183	0.081393	0.72264	outcome	TRUE	reported	0.0832928	6	4.0281e-16	31870183	bbj-a-99	|| id:bbj-a-99	TRUE	reported	igd	2	TRUE	3.8028e-05
rs374698	T	C	T	C	-0.692653	-0.047497	0.068768	0.06115	FALSE	FALSE	FALSE	OgLJ7a	6	32012279	0.092815	0.60884	outcome	TRUE	reported	0.0866801	6	1.33937e-15	32012279	bbj-a-99	|| id:bbj-a-99	TRUE	reported	igd	2	TRUE	3.8495e-05
rs3998115	C	G	C	G	0.612762	0.051615	0.917505	0.8319	FALSE	TRUE	FALSE	OgLJ7a	6	33784833	0.05877	0.37981	outcome	TRUE	reported	0.0737906	6	1.006e-16	33784833	bbj-a-99	|| id:bbj-a-99	TRUE	reported	igd	2	TRUE	4.91343e-05
rs4148871	G	A	G	A	0.425938	-0.034607	0.841846	0.8459	FALSE	FALSE	FALSE	OgLJ7a	6	32803316	0.050746	0.49527	outcome	TRUE	reported	0.0544363	6	5.09565e-15	32803316	bbj-a-99	|| id:bbj-a-99	TRUE	reported	igd	2	TRUE	7.67354e-05
rs4148878	G	T	G	T	-0.729237	-0.11605	0.0613337	0.05691	FALSE	FALSE	FALSE	OgLJ7a	6	32822186	0.087736	0.18595	outcome	TRUE	reported	0.0871663	6	5.95799e-17	32822186	bbj-a-99	|| id:bbj-a-99	TRUE	reported	igd	2	TRUE	3.7933e-05
rs4538748	C	T	C	T	0.518223	-0.016295	0.648051	0.5888	FALSE	FALSE	FALSE	OgLJ7a	6	32657505	0.036646	0.65656	outcome	TRUE	reported	0.0408114	6	6.06597e-37	32657505	bbj-a-99	|| id:bbj-a-99	TRUE	reported	igd	2	TRUE	0.000346199
rs4713602	A	C	A	C	-0.609692	-0.086536	0.117758	0.1548	FALSE	FALSE	FALSE	OgLJ7a	6	32965889	0.063781	0.17486	outcome	TRUE	reported	0.0691837	6	1.22208e-18	32965889	bbj-a-99	|| id:bbj-a-99	TRUE	reported	igd	2	TRUE	7.59554e-05
rs4713643	A	C	A	C	0.676957	0.10837	0.916226	0.9313	FALSE	FALSE	FALSE	OgLJ7a	6	33594437	0.066729	0.10436	outcome	TRUE	reported	0.0745181	6	1.04232e-19	33594437	bbj-a-99	|| id:bbj-a-99	TRUE	reported	igd	2	TRUE	5.96318e-05
rs499606	T	C	T	C	0.352013	0.0080709	0.178778	0.1781	FALSE	FALSE	FALSE	OgLJ7a	6	32194308	0.045557	0.85938	outcome	TRUE	reported	0.0512678	6	6.59478e-12	32194308	bbj-a-99	|| id:bbj-a-99	TRUE	reported	igd	2	TRUE	6.51583e-05
rs549060653	T	C	T	C	-0.57004	-0.17471	0.0463799	0.02961	FALSE	FALSE	FALSE	OgLJ7a	6	30480350	0.11247	0.12034	outcome	TRUE	reported	0.0977664	6	5.52192e-09	30480350	bbj-a-99	|| id:bbj-a-99	TRUE	reported	igd	2	TRUE	1.41548e-05
rs56386174	T	G	T	G	0.613308	-0.071631	0.958759	0.9613	FALSE	FALSE	FALSE	OgLJ7a	6	33591103	0.1363	0.59919	outcome	TRUE	reported	0.104076	6	3.79446e-09	33591103	bbj-a-99	|| id:bbj-a-99	TRUE	reported	igd	2	TRUE	1.29259e-05
rs58110932	T	A	T	A	0.292833	-0.03772	0.394229	0.3079	FALSE	TRUE	FALSE	OgLJ7a	6	32371292	0.039	0.33346	outcome	TRUE	reported	0.0389842	6	5.84117e-14	32371292	bbj-a-99	|| id:bbj-a-99	TRUE	reported	igd	2	TRUE	0.000126849
rs6913309	A	T	A	T	-0.666869	-0.019989	0.127948	0.1927	FALSE	TRUE	FALSE	OgLJ7a	6	32339840	0.049963	0.6891	outcome	TRUE	reported	0.0616765	6	3.00815e-27	32339840	bbj-a-99	|| id:bbj-a-99	TRUE	reported	igd	2	TRUE	0.000122796
rs6917611	C	G	C	G	0.222751	0.0088081	0.481247	0.4694	FALSE	TRUE	TRUE	OgLJ7a	6	32774954	0.031714	0.78121	outcome	TRUE	reported	0.0381188	6	5.10858e-09	32774954	bbj-a-99	|| id:bbj-a-99	TRUE	reported	igd	2	FALSE	8.02521e-05
rs73408232	T	C	T	C	-0.558572	-0.077396	0.0404927	0.04294	FALSE	FALSE	FALSE	OgLJ7a	6	33626042	0.085041	0.36277	outcome	TRUE	reported	0.10166	6	3.91778e-08	33626042	bbj-a-99	|| id:bbj-a-99	TRUE	reported	igd	2	TRUE	1.10421e-05
rs75509151	T	C	T	C	-0.587465	-0.029983	0.0544243	0.05388	FALSE	FALSE	FALSE	OgLJ7a	6	31656514	0.10293	0.77083	outcome	TRUE	reported	0.0890634	6	4.2228e-11	31656514	bbj-a-99	|| id:bbj-a-99	TRUE	reported	igd	2	TRUE	2.10776e-05
rs769174	G	C	G	C	-0.517212	-0.013322	0.0696424	0.07163	FALSE	TRUE	FALSE	OgLJ7a	6	31551066	0.084584	0.87485	outcome	TRUE	reported	0.0788913	6	5.52713e-11	31551066	bbj-a-99	|| id:bbj-a-99	TRUE	reported	igd	2	TRUE	2.62162e-05
rs7741871	A	G	A	G	-0.433991	-0.041694	0.108106	0.1148	FALSE	FALSE	FALSE	OgLJ7a	6	33864354	0.053064	0.43202	outcome	TRUE	reported	0.0638857	6	1.09648e-11	33864354	bbj-a-99	|| id:bbj-a-99	TRUE	reported	igd	2	TRUE	4.18875e-05
rs77746323	T	C	T	C	0.516645	0.023388	0.598984	0.5813	FALSE	FALSE	FALSE	OgLJ7a	6	33036401	0.037198	0.52952	outcome	TRUE	reported	0.0397601	6	1.32221e-38	33036401	bbj-a-99	|| id:bbj-a-99	TRUE	reported	igd	2	TRUE	0.000381798
rs86715	G	A	G	A	-0.663203	-0.074964	0.0929663	0.0805	FALSE	FALSE	FALSE	OgLJ7a	6	33480435	0.062046	0.22697	outcome	TRUE	reported	0.0703847	6	4.40251e-21	33480435	bbj-a-99	|| id:bbj-a-99	TRUE	reported	igd	2	TRUE	7.04778e-05
rs909267	C	T	C	T	-0.597084	0.035608	0.0785742	0.1	FALSE	FALSE	FALSE	OgLJ7a	6	31746548	0.069546	0.60865	outcome	TRUE	reported	0.0754155	6	2.42773e-15	31746548	bbj-a-99	|| id:bbj-a-99	TRUE	reported	igd	2	TRUE	4.27225e-05
rs9262562	A	G	A	G	-0.413952	0.024916	0.0755227	0.1076	FALSE	FALSE	FALSE	OgLJ7a	6	31008949	0.067195	0.71078	outcome	TRUE	reported	0.074244	6	2.4674e-08	31008949	bbj-a-99	|| id:bbj-a-99	TRUE	reported	igd	2	TRUE	2.04323e-05
rs9264086	A	G	A	G	0.265911	-0.00076687	0.532574	0.5225	FALSE	FALSE	FALSE	OgLJ7a	6	31201684	0.033156	0.98155	outcome	TRUE	reported	0.0381991	6	3.37365e-12	31201684	bbj-a-99	|| id:bbj-a-99	TRUE	reported	igd	2	TRUE	0.00011356
rs9296067	T	C	T	C	-0.365883	-0.056087	0.236557	0.1907	FALSE	FALSE	FALSE	OgLJ7a	6	32988340	0.04042	0.16526	outcome	TRUE	reported	0.0462203	6	2.45132e-15	32988340	bbj-a-99	|| id:bbj-a-99	TRUE	reported	igd	2	TRUE	0.000106537
rs9348734	T	C	T	C	0.266271	0.0026073	0.765163	0.7817	FALSE	FALSE	FALSE	OgLJ7a	6	26872409	0.039641	0.94756	outcome	TRUE	reported	0.047403	6	1.94089e-08	26872409	bbj-a-99	|| id:bbj-a-99	TRUE	reported	igd	2	TRUE	5.33733e-05
rs9378180	T	A	T	A	0.208351	-0.011434	0.508596	0.5289	FALSE	TRUE	TRUE	OgLJ7a	6	33099401	0.033144	0.73011	outcome	TRUE	reported	0.0380315	6	4.2925e-08	33099401	bbj-a-99	|| id:bbj-a-99	TRUE	reported	igd	2	FALSE	7.06127e-05
rs9468975	T	C	T	C	0.285596	-0.016844	0.335984	0.2626	FALSE	FALSE	FALSE	OgLJ7a	6	31320467	0.037937	0.65705	outcome	TRUE	reported	0.0423381	6	1.52405e-11	31320467	bbj-a-99	|| id:bbj-a-99	TRUE	reported	igd	2	TRUE	9.55665e-05

## Sheet: Table S3
Table S3. Detailed data after harmonization of instrumental variables for CHB with the hospitalized COVID-19 dataset.
SNP	effect_allele.exposure	other_allele.exposure	effect_allele.outcome	other_allele.outcome	beta.exposure	beta.outcome	eaf.exposure	eaf.outcome	remove	palindromic	ambiguous	id.outcome	chr.outcome	pos.outcome	se.outcome	pval.outcome	outcome	mr_keep.outcome	pval_origin.outcome	se.exposure	chr.exposure	pval.exposure	pos.exposure	id.exposure	exposure	mr_keep.exposure	pval_origin.exposure	data_source.exposure	action	mr_keep	r2
rs1003879	A	G	A	G	0.294129	0.053386	0.382035	0.4204	FALSE	FALSE	FALSE	aA72ek	6	32299592	0.050954	0.29476	outcome	TRUE	reported	0.0391892	6	6.12491e-14	32299592	bbj-a-99	|| id:bbj-a-99	TRUE	reported	igd	2	TRUE	0.000125192
rs111718686	C	T	C	T	-0.584032	-0.029184	0.0584124	0.07749	FALSE	FALSE	FALSE	aA72ek	6	32697405	0.079849	0.71475	outcome	TRUE	reported	0.0880741	6	3.33119e-11	32697405	bbj-a-99	|| id:bbj-a-99	TRUE	reported	igd	2	TRUE	2.27672e-05
rs112199989	A	G	A	G	-0.707237	-0.061227	0.0500135	0.054	FALSE	FALSE	FALSE	aA72ek	6	33308380	0.084868	0.47064	outcome	TRUE	reported	0.100173	6	1.66341e-12	33308380	bbj-a-99	|| id:bbj-a-99	TRUE	reported	igd	2	TRUE	2.22946e-05
rs113720465	A	G	A	G	-0.576779	0.01808	0.0577905	0.06306	FALSE	FALSE	FALSE	aA72ek	6	32005355	0.10763	0.86661	outcome	TRUE	reported	0.088593	6	7.49376e-11	32005355	bbj-a-99	|| id:bbj-a-99	TRUE	reported	igd	2	TRUE	2.17266e-05
rs114485144	C	T	C	T	-0.596902	-0.14049	0.0420556	0.03303	FALSE	FALSE	FALSE	aA72ek	6	33376436	0.10451	0.17885	outcome	TRUE	reported	0.10073	6	3.10892e-09	33376436	bbj-a-99	|| id:bbj-a-99	TRUE	reported	igd	2	TRUE	1.33174e-05
rs114634557	T	G	T	G	-0.601234	-0.25649	0.0471165	0.03342	FALSE	FALSE	FALSE	aA72ek	6	30681315	0.10871	0.018301	outcome	TRUE	reported	0.0988412	6	1.18084e-09	30681315	bbj-a-99	|| id:bbj-a-99	TRUE	reported	igd	2	TRUE	1.56384e-05
rs114815710	A	G	A	G	-0.428239	-0.15133	0.0699852	0.06757	FALSE	FALSE	FALSE	aA72ek	6	30942121	0.085125	0.075442	outcome	TRUE	reported	0.0772799	6	3.00075e-08	30942121	bbj-a-99	|| id:bbj-a-99	TRUE	reported	igd	2	TRUE	1.88149e-05
rs116037546	G	A	G	A	-0.582111	-0.27233	0.042731	0.02511	FALSE	FALSE	FALSE	aA72ek	6	30238581	0.12178	0.02533	outcome	TRUE	reported	0.102798	6	1.49053e-08	30238581	bbj-a-99	|| id:bbj-a-99	TRUE	reported	igd	2	TRUE	1.23477e-05
rs11757876	T	C	T	C	-0.737898	-0.050139	0.0621208	0.05381	FALSE	FALSE	FALSE	aA72ek	6	32232165	0.11376	0.65941	outcome	TRUE	reported	0.085887	6	8.5842e-18	32232165	bbj-a-99	|| id:bbj-a-99	TRUE	reported	igd	2	TRUE	4.04845e-05
rs11758242	A	C	A	C	-0.562584	-0.067886	0.0680462	0.0619	FALSE	FALSE	FALSE	aA72ek	6	31639845	0.086183	0.43088	outcome	TRUE	reported	0.0801738	6	2.26621e-12	31639845	bbj-a-99	|| id:bbj-a-99	TRUE	reported	igd	2	TRUE	2.93951e-05
rs12614	T	C	T	C	-0.649072	-0.054208	0.0729131	0.1144	FALSE	FALSE	FALSE	aA72ek	6	31914179	0.068291	0.42733	outcome	TRUE	reported	0.078631	6	1.52335e-16	31914179	bbj-a-99	|| id:bbj-a-99	TRUE	reported	igd	2	TRUE	4.33602e-05
rs1264569	T	C	T	C	0.553201	0.18695	0.948222	0.9491	FALSE	FALSE	FALSE	aA72ek	6	30365320	0.093733	0.046099	outcome	TRUE	reported	0.0934109	6	3.17614e-09	30365320	bbj-a-99	|| id:bbj-a-99	TRUE	reported	igd	2	TRUE	1.62104e-05
rs12664430	T	C	T	C	-0.522091	-0.11429	0.0659395	0.057	FALSE	FALSE	FALSE	aA72ek	6	33272677	0.081544	0.16103	outcome	TRUE	reported	0.0809408	6	1.1164e-10	33272677	bbj-a-99	|| id:bbj-a-99	TRUE	reported	igd	2	TRUE	2.41238e-05
rs16870693	A	C	A	C	0.3457	0.0056278	0.170368	0.1088	FALSE	FALSE	FALSE	aA72ek	6	32711691	0.059449	0.92458	outcome	TRUE	reported	0.0524686	6	4.43711e-11	32711691	bbj-a-99	|| id:bbj-a-99	TRUE	reported	igd	2	TRUE	5.77618e-05
rs181816009	A	G	A	G	-0.496369	-0.064395	0.0741036	0.05902	FALSE	FALSE	FALSE	aA72ek	6	31423412	0.12163	0.59649	outcome	TRUE	reported	0.078827	6	3.03571e-10	31423412	bbj-a-99	|| id:bbj-a-99	TRUE	reported	igd	2	TRUE	2.56111e-05
rs187940579	A	C	A	C	-0.831584	-0.051429	0.0680787	0.08514	FALSE	FALSE	FALSE	aA72ek	6	32448094	0.076986	0.50411	outcome	TRUE	reported	0.0919943	6	1.57362e-19	32448094	bbj-a-99	|| id:bbj-a-99	TRUE	reported	igd	2	TRUE	4.88032e-05
rs2071025	G	A	G	A	0.351832	0.061203	0.669424	0.6007	FALSE	FALSE	FALSE	aA72ek	6	33143756	0.037849	0.10588	outcome	TRUE	reported	0.040854	6	7.18456e-18	33143756	bbj-a-99	|| id:bbj-a-99	TRUE	reported	igd	2	TRUE	0.000154505
rs2071287	T	C	T	C	-0.357342	-0.037648	0.346743	0.3563	FALSE	FALSE	FALSE	aA72ek	6	32170433	0.038515	0.32834	outcome	TRUE	reported	0.0403423	6	8.16394e-19	32170433	bbj-a-99	|| id:bbj-a-99	TRUE	reported	igd	2	TRUE	0.000167304
rs2516518	A	G	A	G	-0.483845	-0.1143	0.0766185	0.05918	FALSE	FALSE	FALSE	aA72ek	6	31435119	0.088587	0.19696	outcome	TRUE	reported	0.0783357	6	6.55149e-10	31435119	bbj-a-99	|| id:bbj-a-99	TRUE	reported	igd	2	TRUE	2.54083e-05
rs2517459	C	T	C	T	0.465482	0.092491	0.847723	0.8597	FALSE	FALSE	FALSE	aA72ek	6	30897022	0.055774	0.097252	outcome	TRUE	reported	0.0556422	6	5.97998e-17	30897022	bbj-a-99	|| id:bbj-a-99	TRUE	reported	igd	2	TRUE	8.50457e-05
rs2523545	A	G	A	G	0.550566	0.016131	0.871667	0.8282	FALSE	FALSE	FALSE	aA72ek	6	31333499	0.056457	0.77509	outcome	TRUE	reported	0.0601607	6	5.61048e-20	31333499	bbj-a-99	|| id:bbj-a-99	TRUE	reported	igd	2	TRUE	8.8196e-05
rs2523655	G	A	G	A	0.562514	0.094462	0.87244	0.9031	FALSE	FALSE	FALSE	aA72ek	6	31444604	0.068777	0.16961	outcome	TRUE	reported	0.0617001	6	7.73036e-20	31444604	bbj-a-99	|| id:bbj-a-99	TRUE	reported	igd	2	TRUE	8.70787e-05
rs2763977	A	G	A	G	-0.564897	-0.060345	0.0567954	0.0634	FALSE	FALSE	FALSE	aA72ek	6	31786963	0.089775	0.50147	outcome	TRUE	reported	0.0884428	6	1.69013e-10	31786963	bbj-a-99	|| id:bbj-a-99	TRUE	reported	igd	2	TRUE	2.05731e-05
rs28359884	A	C	A	C	-0.340367	-0.033137	0.500766	0.5647	FALSE	FALSE	FALSE	aA72ek	6	32584330	0.047533	0.48572	outcome	TRUE	reported	0.0394983	6	6.85804e-18	32584330	bbj-a-99	|| id:bbj-a-99	TRUE	reported	igd	2	TRUE	0.000174761
rs28360975	T	G	T	G	-0.410106	-0.0097783	0.0792924	0.1555	FALSE	FALSE	FALSE	aA72ek	6	30978834	0.063169	0.87698	outcome	TRUE	reported	0.0724373	6	1.50024e-08	30978834	bbj-a-99	|| id:bbj-a-99	TRUE	reported	igd	2	TRUE	2.20287e-05
rs28869508	T	C	T	C	-0.464699	0.0080064	0.140952	0.1291	FALSE	FALSE	FALSE	aA72ek	6	32343735	0.053374	0.88076	outcome	TRUE	reported	0.0576931	6	7.96893e-16	32343735	bbj-a-99	|| id:bbj-a-99	TRUE	reported	igd	2	TRUE	7.39523e-05
rs3130785	C	T	C	T	0.508149	0.17197	0.880819	0.8945	FALSE	FALSE	FALSE	aA72ek	6	30796738	0.067326	0.010643	outcome	TRUE	reported	0.0633873	6	1.08743e-15	30796738	bbj-a-99	|| id:bbj-a-99	TRUE	reported	igd	2	TRUE	6.35095e-05
rs3131007	T	A	T	A	0.34087	-0.11363	0.68933	0.6175	FALSE	TRUE	FALSE	aA72ek	6	31098344	0.03994	0.0044398	outcome	TRUE	reported	0.041622	6	2.61999e-16	31098344	bbj-a-99	|| id:bbj-a-99	TRUE	reported	igd	2	TRUE	0.000135215
rs34249798	T	G	T	G	-0.677813	-0.020532	0.065259	0.07615	FALSE	FALSE	FALSE	aA72ek	6	31870183	0.079313	0.79573	outcome	TRUE	reported	0.0832928	6	4.0281e-16	31870183	bbj-a-99	|| id:bbj-a-99	TRUE	reported	igd	2	TRUE	3.8028e-05
rs374698	T	C	T	C	-0.692653	-0.092593	0.068768	0.06403	FALSE	FALSE	FALSE	aA72ek	6	32012279	0.10528	0.37914	outcome	TRUE	reported	0.0866801	6	1.33937e-15	32012279	bbj-a-99	|| id:bbj-a-99	TRUE	reported	igd	2	TRUE	3.8495e-05
rs3998115	C	G	C	G	0.612762	0.073458	0.917505	0.891	FALSE	TRUE	FALSE	aA72ek	6	33784833	0.062719	0.24151	outcome	TRUE	reported	0.0737906	6	1.006e-16	33784833	bbj-a-99	|| id:bbj-a-99	TRUE	reported	igd	2	TRUE	4.91343e-05
rs4148871	G	A	G	A	0.425938	-0.0072355	0.841846	0.8364	FALSE	FALSE	FALSE	aA72ek	6	32803316	0.05288	0.89117	outcome	TRUE	reported	0.0544363	6	5.09565e-15	32803316	bbj-a-99	|| id:bbj-a-99	TRUE	reported	igd	2	TRUE	7.67354e-05
rs4148878	G	T	G	T	-0.729237	-0.1509	0.0613337	0.0645	FALSE	FALSE	FALSE	aA72ek	6	32822186	0.082999	0.069054	outcome	TRUE	reported	0.0871663	6	5.95799e-17	32822186	bbj-a-99	|| id:bbj-a-99	TRUE	reported	igd	2	TRUE	3.7933e-05
rs4538748	C	T	C	T	0.518223	-0.0041227	0.648051	0.5768	FALSE	FALSE	FALSE	aA72ek	6	32657505	0.038986	0.91578	outcome	TRUE	reported	0.0408114	6	6.06597e-37	32657505	bbj-a-99	|| id:bbj-a-99	TRUE	reported	igd	2	TRUE	0.000346199
rs4713602	A	C	A	C	-0.609692	-0.085446	0.117758	0.1644	FALSE	FALSE	FALSE	aA72ek	6	32965889	0.063584	0.17901	outcome	TRUE	reported	0.0691837	6	1.22208e-18	32965889	bbj-a-99	|| id:bbj-a-99	TRUE	reported	igd	2	TRUE	7.59554e-05
rs4713643	A	C	A	C	0.676957	0.12986	0.916226	0.9267	FALSE	FALSE	FALSE	aA72ek	6	33594437	0.069427	0.061417	outcome	TRUE	reported	0.0745181	6	1.04232e-19	33594437	bbj-a-99	|| id:bbj-a-99	TRUE	reported	igd	2	TRUE	5.96318e-05
rs499606	T	C	T	C	0.352013	-0.011515	0.178778	0.1782	FALSE	FALSE	FALSE	aA72ek	6	32194308	0.050726	0.82042	outcome	TRUE	reported	0.0512678	6	6.59478e-12	32194308	bbj-a-99	|| id:bbj-a-99	TRUE	reported	igd	2	TRUE	6.51583e-05
rs549060653	T	C	T	C	-0.57004	-0.27994	0.0463799	0.03171	FALSE	FALSE	FALSE	aA72ek	6	30480350	0.13331	0.035741	outcome	TRUE	reported	0.0977664	6	5.52192e-09	30480350	bbj-a-99	|| id:bbj-a-99	TRUE	reported	igd	2	TRUE	1.41548e-05
rs56386174	T	G	T	G	0.613308	-0.11986	0.958759	0.9616	FALSE	FALSE	FALSE	aA72ek	6	33591103	0.14956	0.42288	outcome	TRUE	reported	0.104076	6	3.79446e-09	33591103	bbj-a-99	|| id:bbj-a-99	TRUE	reported	igd	2	TRUE	1.29259e-05
rs58110932	T	A	T	A	0.292833	-0.021146	0.394229	0.3065	FALSE	TRUE	FALSE	aA72ek	6	32371292	0.042678	0.62026	outcome	TRUE	reported	0.0389842	6	5.84117e-14	32371292	bbj-a-99	|| id:bbj-a-99	TRUE	reported	igd	2	TRUE	0.000126849
rs6913309	A	T	A	T	-0.666869	-0.021855	0.127948	0.2044	FALSE	TRUE	FALSE	aA72ek	6	32339840	0.05251	0.67727	outcome	TRUE	reported	0.0616765	6	3.00815e-27	32339840	bbj-a-99	|| id:bbj-a-99	TRUE	reported	igd	2	TRUE	0.000122796
rs6917611	C	G	C	G	0.222751	0.048959	0.481247	0.4658	FALSE	TRUE	TRUE	aA72ek	6	32774954	0.036307	0.17751	outcome	TRUE	reported	0.0381188	6	5.10858e-09	32774954	bbj-a-99	|| id:bbj-a-99	TRUE	reported	igd	2	FALSE	8.02521e-05
rs73408232	T	C	T	C	-0.558572	-0.090607	0.0404927	0.04635	FALSE	FALSE	FALSE	aA72ek	6	33626042	0.09274	0.32857	outcome	TRUE	reported	0.10166	6	3.91778e-08	33626042	bbj-a-99	|| id:bbj-a-99	TRUE	reported	igd	2	TRUE	1.10421e-05
rs75509151	T	C	T	C	-0.587465	-0.032224	0.0544243	0.0578	FALSE	FALSE	FALSE	aA72ek	6	31656514	0.093347	0.72994	outcome	TRUE	reported	0.0890634	6	4.2228e-11	31656514	bbj-a-99	|| id:bbj-a-99	TRUE	reported	igd	2	TRUE	2.10776e-05
rs769174	G	C	G	C	-0.517212	-0.04421	0.0696424	0.08076	FALSE	TRUE	FALSE	aA72ek	6	31551066	0.079597	0.57861	outcome	TRUE	reported	0.0788913	6	5.52713e-11	31551066	bbj-a-99	|| id:bbj-a-99	TRUE	reported	igd	2	TRUE	2.62162e-05
rs7741871	A	G	A	G	-0.433991	-0.049768	0.108106	0.1145	FALSE	FALSE	FALSE	aA72ek	6	33864354	0.056952	0.3822	outcome	TRUE	reported	0.0638857	6	1.09648e-11	33864354	bbj-a-99	|| id:bbj-a-99	TRUE	reported	igd	2	TRUE	4.18875e-05
rs77746323	T	C	T	C	0.516645	-0.0057873	0.598984	0.565	FALSE	FALSE	FALSE	aA72ek	6	33036401	0.046224	0.90036	outcome	TRUE	reported	0.0397601	6	1.32221e-38	33036401	bbj-a-99	|| id:bbj-a-99	TRUE	reported	igd	2	TRUE	0.000381798
rs86715	G	A	G	A	-0.663203	-0.11011	0.0929663	0.08672	FALSE	FALSE	FALSE	aA72ek	6	33480435	0.065323	0.091864	outcome	TRUE	reported	0.0703847	6	4.40251e-21	33480435	bbj-a-99	|| id:bbj-a-99	TRUE	reported	igd	2	TRUE	7.04778e-05
rs909267	C	T	C	T	-0.597084	-0.024877	0.0785742	0.1107	FALSE	FALSE	FALSE	aA72ek	6	31746548	0.068847	0.71785	outcome	TRUE	reported	0.0754155	6	2.42773e-15	31746548	bbj-a-99	|| id:bbj-a-99	TRUE	reported	igd	2	TRUE	4.27225e-05
rs9262562	A	G	A	G	-0.413952	-0.020382	0.0755227	0.1136	FALSE	FALSE	FALSE	aA72ek	6	31008949	0.069492	0.76929	outcome	TRUE	reported	0.074244	6	2.4674e-08	31008949	bbj-a-99	|| id:bbj-a-99	TRUE	reported	igd	2	TRUE	2.04323e-05
rs9264086	A	G	A	G	0.265911	-0.00094842	0.532574	0.5342	FALSE	FALSE	FALSE	aA72ek	6	31201684	0.037437	0.97979	outcome	TRUE	reported	0.0381991	6	3.37365e-12	31201684	bbj-a-99	|| id:bbj-a-99	TRUE	reported	igd	2	TRUE	0.00011356
rs9296067	T	C	T	C	-0.365883	-0.065569	0.236557	0.1992	FALSE	FALSE	FALSE	aA72ek	6	32988340	0.044581	0.14135	outcome	TRUE	reported	0.0462203	6	2.45132e-15	32988340	bbj-a-99	|| id:bbj-a-99	TRUE	reported	igd	2	TRUE	0.000106537
rs9348734	T	C	T	C	0.266271	0.05455	0.765163	0.775	FALSE	FALSE	FALSE	aA72ek	6	26872409	0.043597	0.21084	outcome	TRUE	reported	0.047403	6	1.94089e-08	26872409	bbj-a-99	|| id:bbj-a-99	TRUE	reported	igd	2	TRUE	5.33733e-05
rs9378180	T	A	T	A	0.208351	0.01286	0.508596	0.5238	FALSE	TRUE	TRUE	aA72ek	6	33099401	0.037357	0.73066	outcome	TRUE	reported	0.0380315	6	4.2925e-08	33099401	bbj-a-99	|| id:bbj-a-99	TRUE	reported	igd	2	FALSE	7.06127e-05
rs9468975	T	C	T	C	0.285596	0.036587	0.335984	0.2592	FALSE	FALSE	FALSE	aA72ek	6	31320467	0.042711	0.39166	outcome	TRUE	reported	0.0423381	6	1.52405e-11	31320467	bbj-a-99	|| id:bbj-a-99	TRUE	reported	igd	2	TRUE	9.55665e-05

## Sheet: Table S4
Table S4. Detailed data after harmonization of instrumental variables for CHB with the severe COVID-19 dataset.
SNP	effect_allele.exposure	other_allele.exposure	effect_allele.outcome	other_allele.outcome	beta.exposure	beta.outcome	eaf.exposure	eaf.outcome	remove	palindromic	ambiguous	id.outcome	chr.outcome	pos.outcome	se.outcome	pval.outcome	outcome	mr_keep.outcome	pval_origin.outcome	se.exposure	chr.exposure	pval.exposure	pos.exposure	id.exposure	exposure	mr_keep.exposure	pval_origin.exposure	data_source.exposure	action	mr_keep	r2
rs1003879	A	G	A	G	0.294129	0.028978	0.382035	0.3997	FALSE	FALSE	FALSE	xhyiEq	6	32299592	0.076683	0.70551	outcome	TRUE	reported	0.0391892	6	6.12491e-14	32299592	bbj-a-99	|| id:bbj-a-99	TRUE	reported	igd	2	TRUE	0.000125192
rs111718686	C	T	C	T	-0.584032	-0.085165	0.0584124	0.06095	FALSE	FALSE	FALSE	xhyiEq	6	32697405	0.24565	0.72882	outcome	TRUE	reported	0.0880741	6	3.33119e-11	32697405	bbj-a-99	|| id:bbj-a-99	TRUE	reported	igd	2	TRUE	2.27672e-05
rs112199989	A	G	A	G	-0.707237	-0.23801	0.0500135	0.03878	FALSE	FALSE	FALSE	xhyiEq	6	33308380	0.18556	0.19961	outcome	TRUE	reported	0.100173	6	1.66341e-12	33308380	bbj-a-99	|| id:bbj-a-99	TRUE	reported	igd	2	TRUE	2.22946e-05
rs114485144	C	T	C	T	-0.596902	-0.21038	0.0420556	0.0447	FALSE	FALSE	FALSE	xhyiEq	6	33376436	0.22438	0.34845	outcome	TRUE	reported	0.10073	6	3.10892e-09	33376436	bbj-a-99	|| id:bbj-a-99	TRUE	reported	igd	2	TRUE	1.33174e-05
rs114634557	T	G	T	G	-0.601234	-0.30135	0.0471165	0.04826	FALSE	FALSE	FALSE	xhyiEq	6	30681315	0.25778	0.2424	outcome	TRUE	reported	0.0988412	6	1.18084e-09	30681315	bbj-a-99	|| id:bbj-a-99	TRUE	reported	igd	2	TRUE	1.56384e-05
rs114815710	A	G	A	G	-0.428239	-0.52478	0.0699852	0.06328	FALSE	FALSE	FALSE	xhyiEq	6	30942121	0.25164	0.037029	outcome	TRUE	reported	0.0772799	6	3.00075e-08	30942121	bbj-a-99	|| id:bbj-a-99	TRUE	reported	igd	2	TRUE	1.88149e-05
rs116037546	G	A	G	A	-0.582111	-0.40355	0.042731	0.04498	FALSE	FALSE	FALSE	xhyiEq	6	30238581	0.25827	0.11817	outcome	TRUE	reported	0.102798	6	1.49053e-08	30238581	bbj-a-99	|| id:bbj-a-99	TRUE	reported	igd	2	TRUE	1.23477e-05
rs11758242	A	C	A	C	-0.562584	-0.1551	0.0680462	0.06113	FALSE	FALSE	FALSE	xhyiEq	6	31639845	0.22696	0.49437	outcome	TRUE	reported	0.0801738	6	2.26621e-12	31639845	bbj-a-99	|| id:bbj-a-99	TRUE	reported	igd	2	TRUE	2.93951e-05
rs12614	T	C	T	C	-0.649072	-0.17442	0.0729131	0.06541	FALSE	FALSE	FALSE	xhyiEq	6	31914179	0.19603	0.37357	outcome	TRUE	reported	0.078631	6	1.52335e-16	31914179	bbj-a-99	|| id:bbj-a-99	TRUE	reported	igd	2	TRUE	4.33602e-05
rs1264569	T	C	T	C	0.553201	0.35746	0.948222	0.9496	FALSE	FALSE	FALSE	xhyiEq	6	30365320	0.23995	0.1363	outcome	TRUE	reported	0.0934109	6	3.17614e-09	30365320	bbj-a-99	|| id:bbj-a-99	TRUE	reported	igd	2	TRUE	1.62104e-05
rs12664430	T	C	T	C	-0.522091	-0.11069	0.0659395	0.06745	FALSE	FALSE	FALSE	xhyiEq	6	33272677	0.17275	0.52169	outcome	TRUE	reported	0.0809408	6	1.1164e-10	33272677	bbj-a-99	|| id:bbj-a-99	TRUE	reported	igd	2	TRUE	2.41238e-05
rs16870693	A	C	A	C	0.3457	-0.059021	0.170368	0.1956	FALSE	FALSE	FALSE	xhyiEq	6	32711691	0.11356	0.60324	outcome	TRUE	reported	0.0524686	6	4.43711e-11	32711691	bbj-a-99	|| id:bbj-a-99	TRUE	reported	igd	2	TRUE	5.77618e-05
rs187940579	A	C	A	C	-0.831584	0.034474	0.0680787	0.05763	FALSE	FALSE	FALSE	xhyiEq	6	32448094	0.19996	0.86312	outcome	TRUE	reported	0.0919943	6	1.57362e-19	32448094	bbj-a-99	|| id:bbj-a-99	TRUE	reported	igd	2	TRUE	4.88032e-05
rs2071025	G	A	G	A	0.351832	0.083189	0.669424	0.6782	FALSE	FALSE	FALSE	xhyiEq	6	33143756	0.077786	0.28486	outcome	TRUE	reported	0.040854	6	7.18456e-18	33143756	bbj-a-99	|| id:bbj-a-99	TRUE	reported	igd	2	TRUE	0.000154505
rs2071287	T	C	T	C	-0.357342	-0.18677	0.346743	0.3318	FALSE	FALSE	FALSE	xhyiEq	6	32170433	0.077531	0.015998	outcome	TRUE	reported	0.0403423	6	8.16394e-19	32170433	bbj-a-99	|| id:bbj-a-99	TRUE	reported	igd	2	TRUE	0.000167304
rs2516518	A	G	A	G	-0.483845	-0.2403	0.0766185	0.06303	FALSE	FALSE	FALSE	xhyiEq	6	31435119	0.23553	0.30759	outcome	TRUE	reported	0.0783357	6	6.55149e-10	31435119	bbj-a-99	|| id:bbj-a-99	TRUE	reported	igd	2	TRUE	2.54083e-05
rs2517459	C	T	C	T	0.465482	0.1954	0.847723	0.846	FALSE	FALSE	FALSE	xhyiEq	6	30897022	0.12785	0.12641	outcome	TRUE	reported	0.0556422	6	5.97998e-17	30897022	bbj-a-99	|| id:bbj-a-99	TRUE	reported	igd	2	TRUE	8.50457e-05
rs2523545	A	G	A	G	0.550566	0.15615	0.871667	0.8753	FALSE	FALSE	FALSE	xhyiEq	6	31333499	0.15481	0.31312	outcome	TRUE	reported	0.0601607	6	5.61048e-20	31333499	bbj-a-99	|| id:bbj-a-99	TRUE	reported	igd	2	TRUE	8.8196e-05
rs2523655	G	A	G	A	0.562514	0.261	0.87244	0.8767	FALSE	FALSE	FALSE	xhyiEq	6	31444604	0.18192	0.15137	outcome	TRUE	reported	0.0617001	6	7.73036e-20	31444604	bbj-a-99	|| id:bbj-a-99	TRUE	reported	igd	2	TRUE	8.70787e-05
rs2763977	A	G	A	G	-0.564897	-0.18604	0.0567954	0.06023	FALSE	FALSE	FALSE	xhyiEq	6	31786963	0.28865	0.51924	outcome	TRUE	reported	0.0884428	6	1.69013e-10	31786963	bbj-a-99	|| id:bbj-a-99	TRUE	reported	igd	2	TRUE	2.05731e-05
rs28360975	T	G	T	G	-0.410106	-0.3183	0.0792924	0.07143	FALSE	FALSE	FALSE	xhyiEq	6	30978834	0.23149	0.16914	outcome	TRUE	reported	0.0724373	6	1.50024e-08	30978834	bbj-a-99	|| id:bbj-a-99	TRUE	reported	igd	2	TRUE	2.20287e-05
rs28869508	T	C	T	C	-0.464699	0.23456	0.140952	0.1231	FALSE	FALSE	FALSE	xhyiEq	6	32343735	0.096664	0.015245	outcome	TRUE	reported	0.0576931	6	7.96893e-16	32343735	bbj-a-99	|| id:bbj-a-99	TRUE	reported	igd	2	TRUE	7.39523e-05
rs3130785	C	T	C	T	0.508149	0.39146	0.880819	0.8857	FALSE	FALSE	FALSE	xhyiEq	6	30796738	0.17634	0.026423	outcome	TRUE	reported	0.0633873	6	1.08743e-15	30796738	bbj-a-99	|| id:bbj-a-99	TRUE	reported	igd	2	TRUE	6.35095e-05
rs3131007	T	A	T	A	0.34087	-0.012087	0.68933	0.6866	FALSE	TRUE	FALSE	xhyiEq	6	31098344	0.082242	0.88316	outcome	TRUE	reported	0.041622	6	2.61999e-16	31098344	bbj-a-99	|| id:bbj-a-99	TRUE	reported	igd	2	TRUE	0.000135215
rs34249798	T	G	T	G	-0.677813	-0.0052124	0.065259	0.05671	FALSE	FALSE	FALSE	xhyiEq	6	31870183	0.20652	0.97986	outcome	TRUE	reported	0.0832928	6	4.0281e-16	31870183	bbj-a-99	|| id:bbj-a-99	TRUE	reported	igd	2	TRUE	3.8028e-05
rs3998115	C	G	C	G	0.612762	0.062192	0.917505	0.9167	FALSE	TRUE	FALSE	xhyiEq	6	33784833	0.14159	0.6605	outcome	TRUE	reported	0.0737906	6	1.006e-16	33784833	bbj-a-99	|| id:bbj-a-99	TRUE	reported	igd	2	TRUE	4.91343e-05
rs4148871	G	A	G	A	0.425938	0.022285	0.841846	0.857	FALSE	FALSE	FALSE	xhyiEq	6	32803316	0.12137	0.85431	outcome	TRUE	reported	0.0544363	6	5.09565e-15	32803316	bbj-a-99	|| id:bbj-a-99	TRUE	reported	igd	2	TRUE	7.67354e-05
rs4148878	G	T	G	T	-0.729237	0.038553	0.0613337	0.05261	FALSE	FALSE	FALSE	xhyiEq	6	32822186	0.20292	0.84932	outcome	TRUE	reported	0.0871663	6	5.95799e-17	32822186	bbj-a-99	|| id:bbj-a-99	TRUE	reported	igd	2	TRUE	3.7933e-05
rs4538748	C	T	C	T	0.518223	-0.032922	0.648051	0.6713	FALSE	FALSE	FALSE	xhyiEq	6	32657505	0.079688	0.6795	outcome	TRUE	reported	0.0408114	6	6.06597e-37	32657505	bbj-a-99	|| id:bbj-a-99	TRUE	reported	igd	2	TRUE	0.000346199
rs4713602	A	C	A	C	-0.609692	-0.1449	0.117758	NA	FALSE	FALSE	FALSE	xhyiEq	6	32965889	0.18785	0.4405	outcome	TRUE	reported	0.0691837	6	1.22208e-18	32965889	bbj-a-99	|| id:bbj-a-99	TRUE	reported	igd	2	TRUE	7.59554e-05
rs4713643	A	C	A	C	0.676957	0.13306	0.916226	0.9142	FALSE	FALSE	FALSE	xhyiEq	6	33594437	0.14355	0.35393	outcome	TRUE	reported	0.0745181	6	1.04232e-19	33594437	bbj-a-99	|| id:bbj-a-99	TRUE	reported	igd	2	TRUE	5.96318e-05
rs499606	T	C	T	C	0.352013	-0.028963	0.178778	0.1949	FALSE	FALSE	FALSE	xhyiEq	6	32194308	0.11471	0.80066	outcome	TRUE	reported	0.0512678	6	6.59478e-12	32194308	bbj-a-99	|| id:bbj-a-99	TRUE	reported	igd	2	TRUE	6.51583e-05
rs58110932	T	A	T	A	0.292833	-0.039268	0.394229	0.4153	FALSE	TRUE	FALSE	xhyiEq	6	32371292	0.10177	0.6996	outcome	TRUE	reported	0.0389842	6	5.84117e-14	32371292	bbj-a-99	|| id:bbj-a-99	TRUE	reported	igd	2	TRUE	0.000126849
rs6913309	A	T	A	T	-0.666869	-0.0668	0.127948	0.1267	FALSE	TRUE	FALSE	xhyiEq	6	32339840	0.1363	0.62407	outcome	TRUE	reported	0.0616765	6	3.00815e-27	32339840	bbj-a-99	|| id:bbj-a-99	TRUE	reported	igd	2	TRUE	0.000122796
rs6917611	C	G	C	G	0.222751	0.0019871	0.481247	0.4949	FALSE	TRUE	TRUE	xhyiEq	6	32774954	0.070453	0.9775	outcome	TRUE	reported	0.0381188	6	5.10858e-09	32774954	bbj-a-99	|| id:bbj-a-99	TRUE	reported	igd	2	FALSE	8.02521e-05
rs73408232	T	C	T	C	-0.558572	-0.1047	0.0404927	0.04417	FALSE	FALSE	FALSE	xhyiEq	6	33626042	0.21963	0.63356	outcome	TRUE	reported	0.10166	6	3.91778e-08	33626042	bbj-a-99	|| id:bbj-a-99	TRUE	reported	igd	2	TRUE	1.10421e-05
rs75509151	T	C	T	C	-0.587465	-0.15077	0.0544243	0.05919	FALSE	FALSE	FALSE	xhyiEq	6	31656514	0.2901	0.60327	outcome	TRUE	reported	0.0890634	6	4.2228e-11	31656514	bbj-a-99	|| id:bbj-a-99	TRUE	reported	igd	2	TRUE	2.10776e-05
rs769174	G	C	G	C	-0.517212	-0.21928	0.0696424	0.06121	FALSE	TRUE	FALSE	xhyiEq	6	31551066	0.23563	0.35206	outcome	TRUE	reported	0.0788913	6	5.52713e-11	31551066	bbj-a-99	|| id:bbj-a-99	TRUE	reported	igd	2	TRUE	2.62162e-05
rs7741871	A	G	A	G	-0.433991	-0.016209	0.108106	0.1062	FALSE	FALSE	FALSE	xhyiEq	6	33864354	0.11541	0.8883	outcome	TRUE	reported	0.0638857	6	1.09648e-11	33864354	bbj-a-99	|| id:bbj-a-99	TRUE	reported	igd	2	TRUE	4.18875e-05
rs86715	G	A	G	A	-0.663203	-0.12021	0.0929663	0.08792	FALSE	FALSE	FALSE	xhyiEq	6	33480435	0.13785	0.38316	outcome	TRUE	reported	0.0703847	6	4.40251e-21	33480435	bbj-a-99	|| id:bbj-a-99	TRUE	reported	igd	2	TRUE	7.04778e-05
rs909267	C	T	C	T	-0.597084	-0.010604	0.0785742	0.06893	FALSE	FALSE	FALSE	xhyiEq	6	31746548	0.1881	0.95504	outcome	TRUE	reported	0.0754155	6	2.42773e-15	31746548	bbj-a-99	|| id:bbj-a-99	TRUE	reported	igd	2	TRUE	4.27225e-05
rs9262562	A	G	A	G	-0.413952	-0.2231	0.0755227	0.06715	FALSE	FALSE	FALSE	xhyiEq	6	31008949	0.18359	0.22428	outcome	TRUE	reported	0.074244	6	2.4674e-08	31008949	bbj-a-99	|| id:bbj-a-99	TRUE	reported	igd	2	TRUE	2.04323e-05
rs9264086	A	G	A	G	0.265911	0.041043	0.532574	0.5291	FALSE	FALSE	FALSE	xhyiEq	6	31201684	0.074339	0.58088	outcome	TRUE	reported	0.0381991	6	3.37365e-12	31201684	bbj-a-99	|| id:bbj-a-99	TRUE	reported	igd	2	TRUE	0.00011356
rs9296067	T	C	T	C	-0.365883	0.032712	0.236557	0.2207	FALSE	FALSE	FALSE	xhyiEq	6	32988340	0.086966	0.70681	outcome	TRUE	reported	0.0462203	6	2.45132e-15	32988340	bbj-a-99	|| id:bbj-a-99	TRUE	reported	igd	2	TRUE	0.000106537
rs9348734	T	C	T	C	0.266271	0.11059	0.765163	0.7733	FALSE	FALSE	FALSE	xhyiEq	6	26872409	0.08797	0.2087	outcome	TRUE	reported	0.047403	6	1.94089e-08	26872409	bbj-a-99	|| id:bbj-a-99	TRUE	reported	igd	2	TRUE	5.33733e-05
rs9378180	T	A	T	A	0.208351	-0.0083081	0.508596	0.5088	FALSE	TRUE	TRUE	xhyiEq	6	33099401	0.075016	0.91181	outcome	TRUE	reported	0.0380315	6	4.2925e-08	33099401	bbj-a-99	|| id:bbj-a-99	TRUE	reported	igd	2	FALSE	7.06127e-05
rs9468975	T	C	T	C	0.285596	0.0723	0.335984	0.3225	FALSE	FALSE	FALSE	xhyiEq	6	31320467	0.090164	0.42263	outcome	TRUE	reported	0.0423381	6	1.52405e-11	31320467	bbj-a-99	|| id:bbj-a-99	TRUE	reported	igd	2	TRUE	9.55665e-05

## Sheet: Table S5
Table S5.Sensitivity analysis of the causal association of COVID-19 with CHB.
Exposure	Cochran Q test			MR-Egger		MR-PRESSO	R2
Severity	13.4455	11	0.265209	-0.0650997	0.17341	0.252	0.0154516
Hospitalization	18.5636	15	0.234193	0.0367206	0.334868	0.244	0.00346238
Susceptibility	18.6685	11	0.067309	0.0053378	0.938571	0.096	0.000215401
